# Supplementary material
Source: PubMed Central journal article supplement (PMC9106844)
Supplement: NIHMS1783374-supplement-Supplementary_Table_1.pdf [file NIHMS1783374-supplement-Supplementary_Table_1.pdf]

# Supplemental Table 1: Reagent Information

| In vivo blockade antibodies |         |          |           |          |                  |
|-----------------------------|---------|----------|-----------|----------|------------------|
| Antibody target             | Clone   | Vendor   | Catalog # | Lot#     | Dosage/injection |
| Rat IgG2b isotype           | LTF-2   | BioXcell | BE0090    | 767920D1 | 1mg in 200µl     |
| Rat IgG1 isotype            | TNP6A7  | BioXcell | BE0290    | 713919J3 | 500µg in 200µl   |
| PD-L1                       | 10F.9G2 | BioXcell | BE0101    | 720619F1 | 1mg in 200µl     |
| IL-10r                      | 1B1.3A  | BioXcell | BE0050    | 796021J1 | 500µg in 200µl   |

| 0.2% FACS Buffer       |                          |                |           |          |               |
|------------------------|--------------------------|----------------|-----------|----------|---------------|
| Reagent                | Comments                 | Vendor         | Catalog # | Lot#     | Dilution used |
| 1X DPBS                | (also used individually) | Corning        | 21-031-CM | 07521012 | undiluted     |
| BSA                    |                          | Gemini         | 700-100P  | C40H091  | 2g/L          |
| 0.5M EDTA              |                          | Invitrogen     | 15575-038 | 2187281  | 1:500         |
| Brilliant stain buffer | (in stain cocktail only) | BD Biosciences | 566385    | 1012103  | 1:10          |

| Fc' block Reagents      |            |             |             |             |               |
|-------------------------|------------|-------------|-------------|-------------|---------------|
| Reagent                 | Clone      | Vendor      | Catalog #   | Lot#        | Dilution used |
| anti-CD16/32            | 2.4G2      | BioXcell    | BP0307      | 699819A1    | 1µg/ml        |
| Rat IgG isotype control | polyclonal | Invitrogen  | 10700       | V1312292    | 1:200         |
| 0.2% FACS Buffer        | N/A        | (see above) | (see above) | (see above) | undiluted     |

| Viability dyes       |              |                   |              |                |               |
|----------------------|--------------|-------------------|--------------|----------------|---------------|
| Reagent              | Comments     | Vendor            | Catalog #    | Lot#           | Dilution used |
| Ghost Dye Violet 510 | (in 1X DPBS) | Tonbo Biosciences | 13-0870-T100 | 00870111920133 | 1:200         |
| Live Dead Aqua       | (in 1X DPBS) | Invitrogen        | L349466      | 2268307        | 1:200         |

| Permeabilization reagents        |                               |            |            |         |               |
|----------------------------------|-------------------------------|------------|------------|---------|---------------|
| Reagent                          | Comments                      | Vendor     | Catalog #  | Lot#    | Dilution used |
| Fix/Permeabilization Concentrate | (Diluted in Fix/Perm Diluent) | Invitrogen | 00-5123-43 | 2308580 | 1:4           |
| Fix/Permeabilization Diluent     |                               | Invitrogen | 00-5223-56 | 2293945 | 4:1           |
| 10x Permeabilization Buffer      | (Diluted in MilliQ H2O)       | Invitrogen | 00-8333-56 | 2308618 | 1:10          |

| Flow cytometry antibodies        |              |                         |              |             |               |
|----------------------------------|--------------|-------------------------|--------------|-------------|---------------|
| Antibody target / color          | Clone        | Vendor                  | Catalog #    | Lot#        | Dilution used |
| B220 BUV395                      | RA2-6B2      | BD Biosciences          | 563793       | 6320735     | 1:200         |
| B220 BUV496                      | RA2-6B2      | BD Biosciences          | 564662       | 8192953     | 1:200         |
| BCL-2 AF647                      | BCL/10C4     | Biologend               | 633510       | B298462     | 1:200         |
| BIM (purified rabbit)            | K.912.7      | Invitrogen              | MA5-14848    | WB3204563   | 1:200         |
| CD3 FITC                         | 145-2C11     | BD Biosciences          | 553062       | 7100982     | 1:200         |
| CD3 BV750                        | 17A2         | Biologend               | 100249       | B291930     | 1:200         |
| CD3 BV785                        | 17A2         | Biologend               | 100231       | B306607     | 1:200         |
| CD3 PerCP Cy5.5                  | 145-2C11     | Invitrogen              | 45-0031-82   | 2074540     | 1:200         |
| CD4 APC                          | GK1.5        | Invitrogen              | 17-0041-83   | E07038-1635 | 1:200         |
| CD4 BV570                        | RM4-5        | Biologend               | 100541       | B252474     | 1:200         |
| CD4 BUV563                       | GK1.5        | BD Biosciences          | 612923       | 1088523     | 1:200         |
| CD4 BUV615                       | GK1.5        | BD Biosciences          | 613008       | 0017996     | 1:200         |
| CD8a BUV563                      | 53-6.7       | BD Biosciences          | 748535       | 1055898     | 1:200         |
| CD8a BUV615                      | 53-6.7       | BD Biosciences          | 613004       | 1190584     | 1:200         |
| CD11a BUV805                     | 2D7          | BD Biosciences          | 741919       | 1955894     | 1:200         |
| CD11b BV605                      | M1/70        | Biologend               | 101257       | B272197     | 1:400         |
| CD11b APC Fire                   | M1/70        | Biologend               | 101262       | B262767     | 1:400         |
| CD11c APC Fire                   | N418         | Biologend               | 117352       | B250822     | 1:200         |
| CD11c BV421                      | N418         | Biologend               | 117330       | B164949     | 1:200         |
| CD19 BUV661                      | 1D3          | BD Biosciences          | 612971       | 9298180     | 1:200         |
| CD25 BV785                       | PC61         | Biologend               | 102051       | B293251     | 1:200         |
| CD25 APC e780                    | PC61         | Invitrogen              | 47-0251-82   | 1942453     | 1:200         |
| CD27 BV650                       | LG.3A10      | Biologend               | 124233       | B281805     | 1:200         |
| CD43 PE                          | S7           | BD Biosciences          | 553271       | 75164       | 1:200         |
| CD44 BV570                       | 1M7          | Biologend               | 103037       | B313873     | 1:100         |
| CD45 BUV805                      | 30-F11       | BD Biosciences          | 748370       | 9228924     | 1:400         |
| CD64 PE Cy7                      | X54-5/7.1    | Biologend               | 139314       | B308662     | 1:200         |
| CD69 BUV737                      | H1.2F3       | BD Biosciences          | 612793       | 0295799     | 1:200         |
| CD73 BV605                       | TY/11.8      | Biologend               | 127215       | B330679     | 1:200         |
| CD80 BUV737                      | 16-10A1      | BD Biosciences          | 564670       | 9002773     | 1:200         |
| CD86 PE Cy5                      | GL-1         | Biologend               | 105015       | B288821     | 1:200         |
| CTLA-4 APC-R700                  | UC10-4F10-11 | BD Biosciences          | 565778       | 0325573     | 1:300         |
| CXCR3 BV650                      | CXCR3-173    | Biologend               | 126531       | B298857     | 1:150         |
| c-Myc Dylight488                 | 9E10         | Invitrogen              | MA1-980-D488 | PF203294    | 1:200         |
| Foxp3 BV421                      | MF-23        | BD Biosciences          | 562996       | 9262419     | 1:100         |
| Foxp3 FITC                       | FJK-16s      | Invitrogen              | 11-5773-82   | E00644-1630 | 1:200         |
| Foxp3 PE                         | FJK-16s      | Invitrogen              | 12-5773-82   | E033867     | 1:200         |
| Foxp3 PE Cy5.5                   | FJK-16s      | Invitrogen              | 35-5773-82   | 2160553     | 1:200         |
| Goat anti-Rabbit IgG (H+L) AF350 | polyclonal   | Invitrogen              | A11046       | 2105691     | 1:400         |
| Granzyme B PE                    | QA16A02      | Biologend               | 372208       | B272321     | 1:100         |
| GITR PerCP Cy5.5                 | DTA-1        | Biologend               | 126315       | B270668     | 1:200         |
| Helios PE e610                   | 22F6         | Invitrogen              | 61-9883-42   | 1998273     | 1:200         |
| Helios PE Dazzle                 | 22F6         | Biologend               | 137235       | B276459     | 1:200         |
| Ki67 BV480                       | B56          | BD Biosciences          | 566172       | 0241342     | 1:600         |
| KLRG1 BUV395                     | 2F1          | BD Biosciences          | 740279       | 9291095     | 1:200         |
| ICOS APC Fire                    | C398.4A      | Biologend               | 313536       | B272285     | 1:200         |
| IFNγ BUV737                      | XMG1.2       | BD Biosciences          | 612769       | 9205652     | 1:200         |
| IFNγ FITC                        | XMG1.2       | Invitrogen              | 11-7311-82   | 4332573     | 1:200         |
| IL-2 PE Cy7                      | JES6-5H4     | Invitrogen              | 25-7021-80   | 1998292     | 1:200         |
| IL-10 BV421                      | JES5-16E3    | Biologend               | 505021       | B303590     | 1:100         |
| IL-12 p40/p70 V450               | C15.6        | BD Biosciences          | 561456       | 6294793     | 1:100         |
| Ly6C BV570                       | HK1.4        | Biologend               | 128030       | B269771     | 1:400         |
| Ly6C BV785                       | HK1.4        | Biologend               | 128041       | B258005     | 1:400         |
| Ly6G BUV563                      | 1A8          | BD Biosciences          | 612921       | 8297921     | 1:400         |
| MHC-II (IA-IE) AF700             | M5/114.15.2  | Biologend               | 107622       | B264454     | 1:400         |
| MHC-II (IA-IE) BV711             | M5/114.15.2  | Biologend               | 107643       | B267735     | 1:400         |
| Mouse anti-Rat IgG2b FITC        | RG7/11.1     | BD Biosciences          | 553900       | 7299915     | 1:200         |
| NK1.1 BV570                      | PK136        | Biologend               | 108733       | B247579     | 1:200         |
| NK1.1 FITC                       | PK136        | Invitrogen              | 11-5941-85   | E00743.1631 | 1:200         |
| NK1.1 PerCP Cy5.5                | PK136        | Biologend               | 108728       | B241349     | 1:200         |
| Normal Goat Serum                | polyclonal   | Jackson Immuno Research | 005-000-121  | i57225      | 1:200         |
| Nur77 PE Cy7                     | 12.14        | Invitrogen              | 25-5965-82   | 2132359     | 1:150         |
| PD-1 BV421                       | 29F.1A12     | Biologend               | 135218       | B302704     | 1:200         |
